# Supplementary material for: Typical structural characteristics and hepatoprotective effects of novel high Fischer ratio oligopeptides from Antarctic krill on acute alcoholic liver injury
Source: Royal Society of Chemistry journal article supplement (doi:10.1039/d4fo02609h), 2024-01-01
Supplement: d4fo02609h1.pdf [file d4fo02609h1.pdf]

**Typical structural characteristics and hepatoprotective effects of novel high  
Fischer ratio oligopeptides from Antarctic krill on acute alcoholic liver injury**

Yan Sun<sup>a</sup>, Huiru Shen<sup>a</sup>, Chaozhong Fan<sup>a</sup>, Cili Wang<sup>a</sup>, Yan Fan<sup>a</sup>, Li Hao<sup>a</sup>, Qiaoji Tian<sup>a</sup>,  
Hu Hou<sup>a, b, c, d\*</sup>

Author affiliation(s):

<sup>a</sup> State Key Laboratory of Marine Food Processing & Safety Control, College of Food Science and Engineering, Ocean University of China, No.1299, Sansha Road, Qingdao, Shandong Province, 266404, P.R. China.

<sup>b</sup> Laboratory for Marine Drugs and Bioproducts, Qingdao Marine Science and Technology Center, Qingdao, 266237, P.R. China.

<sup>c</sup> Qingdao Institute of Marine Bioresources for Nutrition & Health Innovation, Qingdao, Shandong Province, 266000, P.R. China.

<sup>d</sup> Sanya Oceanographic Institution, Ocean University of China, Sanya, Hainan Province, 572024, P.R. China.

\*Corresponding author

Hu Hou, Professor

Tel/Fax: +86-532-60892936

E-mail:                                   houhu@ouc.edu.cn,                                   houhuouc@163.com

**Table S1. The primer sequences of the target genes**

| <b>Genes</b>                   | <b>Forward</b>            | <b>Reverse</b>            |
|--------------------------------|---------------------------|---------------------------|
| <b>ALDH</b>                    | AACATTTCCCACCGTCAACCCTTC  | CAGCCAGCGTAATAGCGGAGAC    |
| <b>ADH</b>                     | GGTTCTCAACTGGCTATGGCTCTG  | CACTCCTACGACGACGCTTACAC   |
| <b>TNF-<math>\alpha</math></b> | CACCACGCTCTTCTGTCTACTGAAC | TGACGGCAGAGAGGAGGTTGAC    |
| <b>IL-6</b>                    | CTTCTTGGGACTGATGCTGGTGAC  | CTCTCTGAAGGACTCTGGCTTTGTC |
| <b>IL-1<math>\beta</math></b>  | TTCAGGCAGGCAGTATCACTCATTG | TTCAGGCAGGCAGTATCACTCATTG |
| <b>CAT</b>                     | CCAGCGACCAGATGAAGCAGTG    | GTGGAGAATCGAACGGCAATAGGG  |
| <b>CYP2E1</b>                  | CCACCCTCCTCCTCGTATCCATC   | CCACCCTCCTCCTCGTATCCATC   |
| <b>Nrf2-1</b>                  | AAGCACAGCCAGCACATTCTCC    | TGACCAGGACTCACGGGAACTTC   |
| <b>NQO1</b>                    | TAGCGGCTCCATGTACTCTCTTCAG | TCCTCCCAGACGGTTTCCAGAC    |
| <b>HO-1</b>                    | ACACAGCACTATGTAAAGCGTCTCC | GTTGAGCAGGAAGGCGGTCTTAG   |
